# Supplementary material for: Air monitoring by nanopore sequencing
Source: PubMed Central journal article supplement (PMC11287864; doi:10.1093/ismeco/ycae099), 2024-07-16
Supplement: supplementary_information_final_ycae099.pdf [file supplementary_information_final_ycae099.pdf]

1 **Supplementary Information**

2 **Supplementary Table 1.** Sampling, DNA, and sequencing data  
3 of all air samples (*pilot\_study* and *urban\_study* sheets):  
4 sampling data includes date, temperature, humidity, and  
5 sampling duration; DNA metrics include total yield and yield per  
6 m<sup>3</sup>; and sequencing data includes total number of reads, filtered  
7 reads, read length distribution (median and N50), read-based  
8 taxonomic classification results using Kraken2, and assembly  
9 statistics using metaflye (Materials and Methods).

10 **Supplementary Table 2.** Environmental pollution of urban  
11 sampling location measured through particle mass fractions  
12 (TSP, PM10, and PM2.5; TSP=total suspended particles;  
13 PM=particulate matter); measurements were taken in one-  
14 minute intervals (Materials and Methods).

15 **Supplementary Table 3.** Antimicrobial resistance and virulence  
16 genes detected by ABRicate and AMRFinderPlus across all air  
17 samples (*pilot\_study* and *urban\_study* sheets) with respective  
18 gene coverage and mapping accuracy metrics (Materials and  
19 Methods).

20

21 **Supplementary Figure 1.** Taxonomic composition on the  
22 taxonomic phylum level using Kraken2, Diamond, and CZID  
23 annotations (Materials and Methods) of the **A.** controlled (Gh),  
24 and **B.** natural (Nat) environment air samples.

25 **Supplementary Figure 2.** Taxonomic composition on the  
26 taxonomic genus level using Kraken2, Diamond, and CZID  
27 annotations (Materials and Methods) of the **A.** controlled (Gh),  
28 and **B.** natural (Nat) environment air samples.

29 **Supplementary Figure 3.** Relative abundance of microbial  
30 genera detected in the negative control samples from **A.** the  
31 controlled (Gh) and **B.** natural (Nat) environments (1: sampling  
32 control; 2: extraction control; 3: sequencing control). **C.** Relative  
33 expected versus observed relative abundance of microbial  
34 species in the positive control sample from a defined mock  
35 community (Materials and Methods).

36 **Supplementary Figure 4.** Particle mass fraction  
37 measurements across urban sampling locations for **A.** TSP, **B.**  
38 PM<sub>10</sub>, and **C.** PM<sub>2.5</sub> [µg/m<sup>3</sup>]. The p-values describe the  
39 differences between all locations using the Kruskal-Wallis test  
40 (Materials and Methods).

41 **Supplementary Figure 5.** Analysis of COG functional  
42 categories in controlled (Gh) and natural (Nat) air samples. **A.**  
43 Annotation of assembled contigs. **B.** Annotation of MAGs. Each  
44 bar aggregates all functionalities detected across the respective  
45 samples from the same sampling condition within the same  
46 functional category.



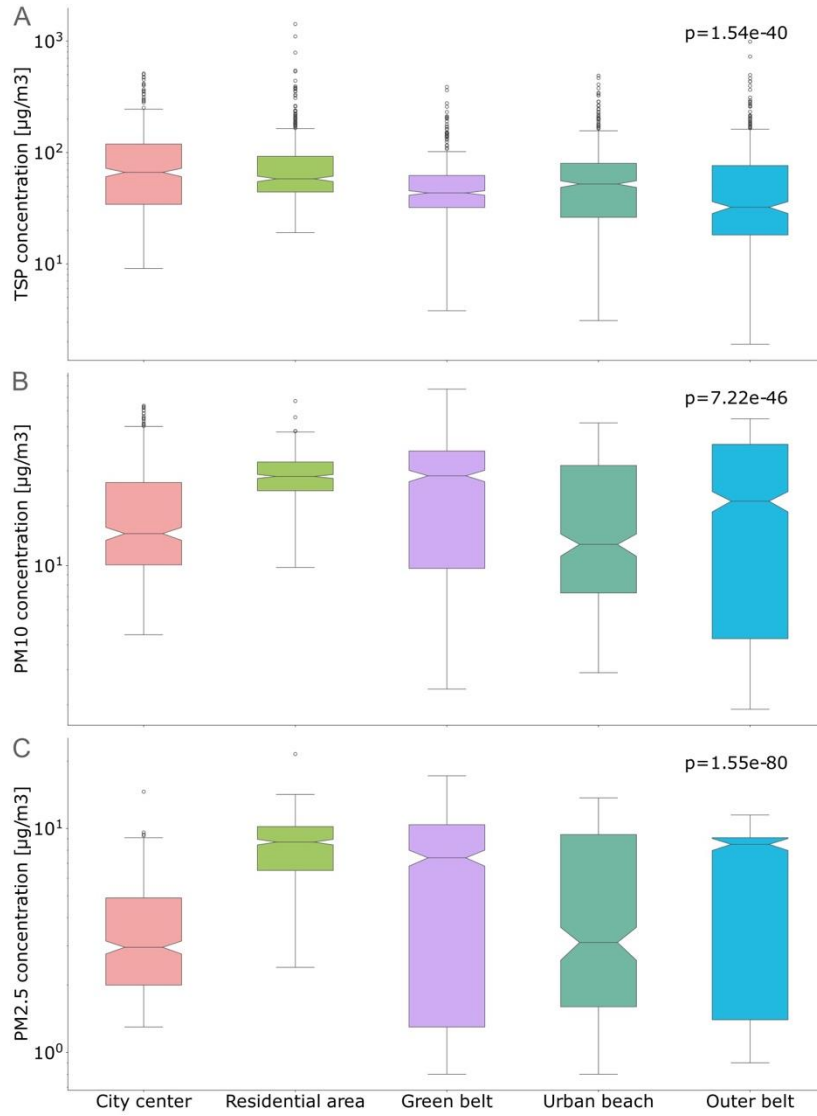

52

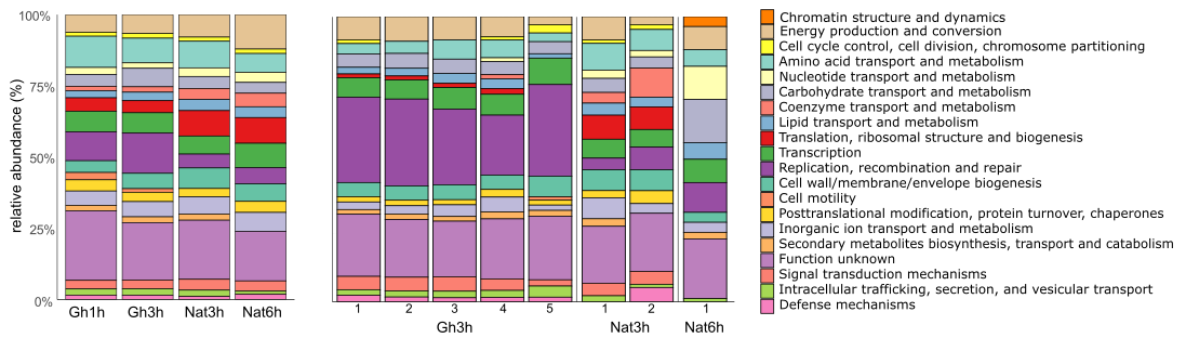

53

54

55

56 *Air sampling and DNA extraction optimizations*

57 We first tested two standard air sampling approaches, the high-  
58 volume sampler (HVS, MCV, Spain) and the Coriolis  $\mu$  liquid  
59 impinger (Bertin Technologies, France), to assess the optimal  
60 air sampler for their compatibility with nanopore shotgun  
61 sequencing.

62 For the HVS, we used quartz filters for air sampling for 24h at a  
63 rate of 500 L/min. We applied both, phenol-chloroform  
64 extraction [1] and the standard PowerSoil Pro kit (QIAGEN,  
65 2018), to the filters. While the phenol-chloroform method  
66 resulted in a higher total DNA yield than the standard extraction  
67 kit (data not shown), the nanodrop nucleic acid 260/280  
68 measurements of around 1.2 indicated that the extracted DNA  
69 was highly contaminated, most likely due to residual phenol,  
70 which would block the nanopores during shotgun sequencing.  
71 The DNA yield of the standard extraction kit, on the other hand,  
72 was not sufficient for nanopore shotgun sequencing, which  
73 made us hypothesize that the standard kit – since not optimized  
74 for DNA extractions from quartz filter – might have chemically  
75 enhanced binding of the particles to the silica-enriched filters,  
76 and might therefore have made extraction inefficient.

77 For the liquid impingement-based and therefore filter-free  
78 sampler Coriolis  $\mu$ , we sampled air for 1h at a rate of 300 L/min,  
79 and extracted sufficient DNA using the standard Qiagen kit: To  
80 increase DNA concentrations, we benchmarked that the volume  
81 of the final elution buffer (EB) could be reduced from the

82 standard of 50  $\mu$ L to 30 $\mu$ L. We further tested if a repeated  
 83 washing of the spin column would further increase the DNA  
 84 yield, which was not the case:

| Sample # | Volume EB        | DNA concentration<br>(ng/ $\mu$ L) | Total DNA (ng) |
|----------|------------------|------------------------------------|----------------|
| 1        | 50 $\mu$ L       | 0.131                              | 6.55           |
| 2        | 50 $\mu$ L       | 0.283                              | 14.15          |
| 3        | 50 $\mu$ L       | 0.330                              | 16.50          |
| 4        | 30 $\mu$ L       | 1.240                              | 37.2           |
| 5        | 30 $\mu$ L       | 0.767                              | 23.01          |
| 6        | 30 $\mu$ L       | 1.69                               | 50.7           |
| 7        | 30 $\mu$ L twice | 0.607                              | 18.09          |
| 8        | 30 $\mu$ L twice | 0.627                              | 18.93          |
| 9        | 30 $\mu$ L twice | 0.609                              | 18.48          |

85

86 *Functional annotation*

87 The general functional analysis of the *de novo* assemblies and  
 88 MAGs revealed a broad spectrum of COG (Clusters of  
 89 Orthologous Genes) functional categories in our controlled and  
 90 natural air samples. Briefly, gene predictions were made using  
 91 Prodigal v2.6.3 [2], with COG functional categories analyzed  
 92 using eggNOG v2.0.1 [3] and taxonomically classified using  
 93 DIAMOND BLASTP. As eggNOG lacked taxonomic resolution,  
 94 we also applied Prokka v1.14.6 [4] followed by DIAMOND  
 95 BLASTP to the bins, which delivered taxonomic and functional  
 96 annotation. Following the findings in 'Omics Insights in

97 Environmental Bioremediation', we filtered the annotated gene  
98 list to select genes involved in biodegradation and  
99 bioremediation. For comparing the functional inferences  
100 between the different sampling durations and locations, we  
101 calculated the relative abundance of the functional categories  
102 for the contigs (**Supplementary Figure 5A**) and MAGs  
103 (**Supplementary Figure 5B**) across samples of each  
104 experiment. We found a broad spectrum of genes  
105 encompassing diverse COG functional categories. The gene  
106 distribution was relatively similar between the controlled and the  
107 environmental setting, which was expected given the very basic  
108 metabolic and replication functionalities that are being described  
109 by COG.

110 The functional annotation of MAGs further allowed us to predict  
111 taxon-specific functions of the air microbiome. We, for example,  
112 obtained a *de novo* assembly of *Sphingomonas alba*, which has  
113 previously only been defined through a soil isolate [5] and might  
114 therefore represent a novel strain with important functional  
115 variation. Our genome annotation identified genes (*flr*, *ribBA*)  
116 from flavin-based metabolic cycles, and a gene (*cher1*) which  
117 plays a role in biofilm formation and chemotaxis [6]. Certain  
118 bacterial taxa exhibit chemotactic responses towards aromatic  
119 hydrocarbons, which are prevalent pollutants, since they utilize  
120 these compounds as carbon sources; the *cher1* gene has been  
121 identified as a key gene in mediating this behavior [7].

122

- 123 1. Castro JF, Nouioui I, Sangal V, Trujillo ME, Montero-  
124 Calasanz MDC, Rahmani T, et al. *Geodermatophilus chilensis*  
125 sp. nov., from soil of the Yungay core-region of the Atacama  
126 Desert, Chile. *Syst Appl Microbiol* 2018; **41**: 427–436.
- 127 2. Hyatt D, Chen G-L, LoCascio PF, Land ML, Larimer FW,  
128 Hauser LJ. Prodigal: prokaryotic gene recognition and  
129 translation initiation site identification. *BMC Bioinformatics* 2010;  
130 **11**: 1–11.
- 131 3. Huerta-Cepas J, Szklarczyk D, Heller D, Hernández-  
132 Plaza A, Forslund SK, Cook H, et al. eggNOG 5.0: a  
133 hierarchical, functionally and phylogenetically annotated  
134 orthology resource based on 5090 organisms and 2502 viruses.  
135 *Nucleic Acids Res* 2019; **47**: D309–D314.
- 136 4. Seemann T. Prokka: rapid prokaryotic genome  
137 annotation. *Bioinformatics* 2014; **30**: 2068–2069.
- 138 5. Siddiqi MZ, Rajivgandhi G, Lee S-Y, Im W-T.  
139 Characterization of four novel bacterial species of the genus  
140 *Sphingomonas*, *Sphingomonas anseongensis*, *Sphingomonas*  
141 *alba*, *Sphingomonas brevis* and *Sphingomonas hankyongi*  
142 sp.nov., isolated from wet land. *International Journal of*  
143 *Systematic and Evolutionary Microbiology* 2023; **73**: 005884.
- 144 6. García-Fontana C, Reyes-Darias JA, Muñoz-Martínez F,  
145 Alfonso C, Morel B, Ramos JL, et al. High Specificity in CheR  
146 Methyltransferase Function: CheR2 OF PSEUDOMONAS  
147 PUTIDA IS ESSENTIAL FOR CHEMOTAXIS, WHEREAS  
148 CheR1 IS INVOLVED IN BIOFILM FORMATION\*. *Journal of*  
149 *Biological Chemistry* 2013; **288**: 18987–18999.



150 7. Lacal J, Muñoz-Martínez F, Reyes-Darías J-A, Duque E,  
151 Matilla M, Segura A, et al. Bacterial chemotaxis towards  
152 aromatic hydrocarbons in *Pseudomonas*. *Environmental*  
153 *Microbiology* 2011; **13**: 1733–1744.  
154
